# Supplementary material for: The Cell Cycle G2/M Block Is an Indicator of Cellular Radiosensitivity
Source: PubMed Central journal article supplement — Dose Response. 2019 Dec 9;17(4):1559325819891008. doi: 10.1177/1559325819891008 (PMC6902394; doi:10.1177/1559325819891008), 2019-12-09

Figure S1: Cell cycle dynamics after exposure to 5 Gy X-rays or 1.7 Gy of carbon ions.

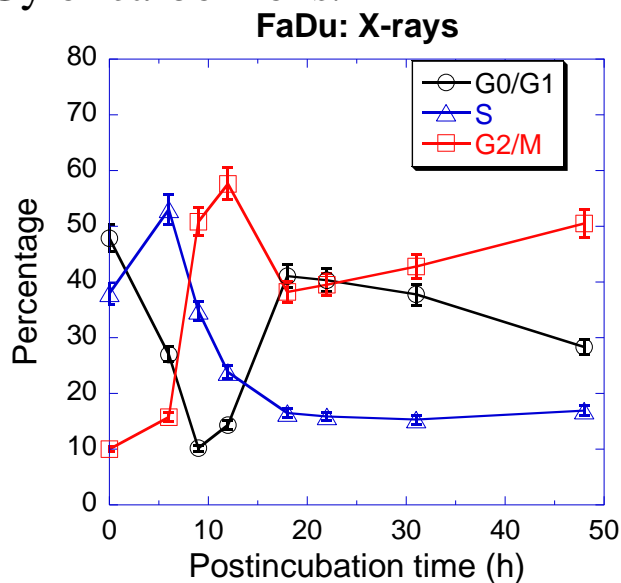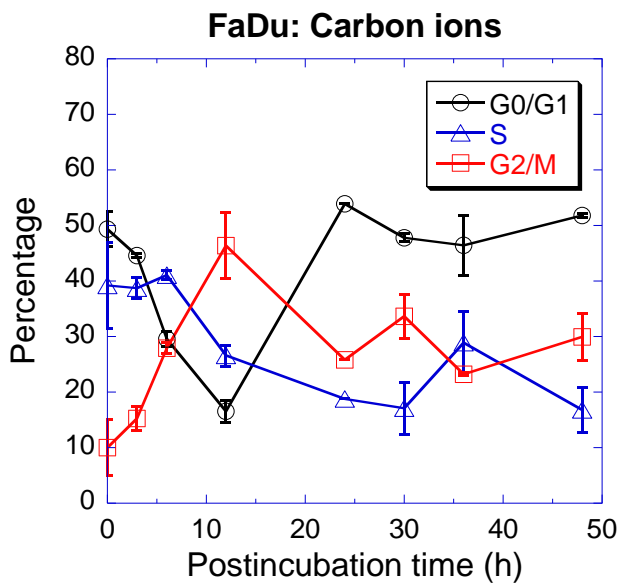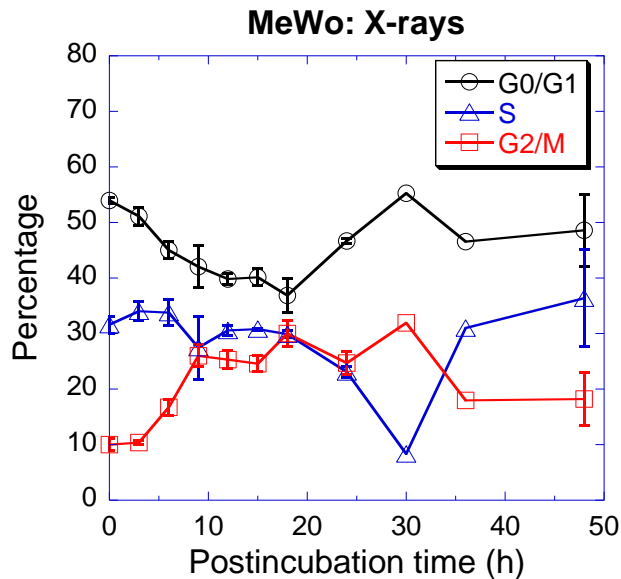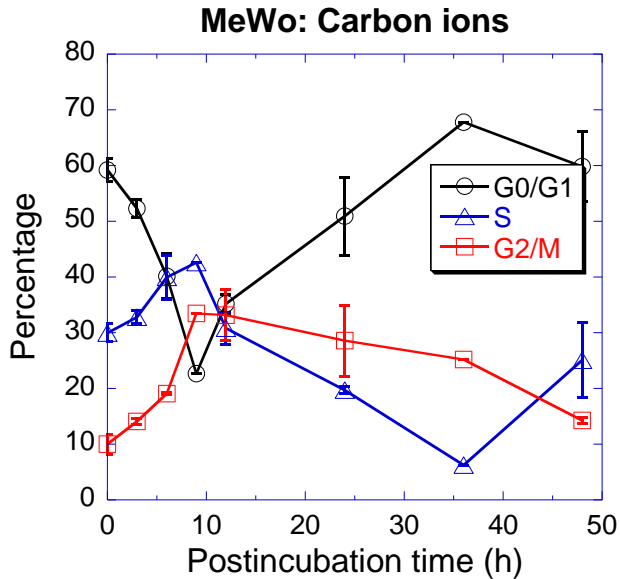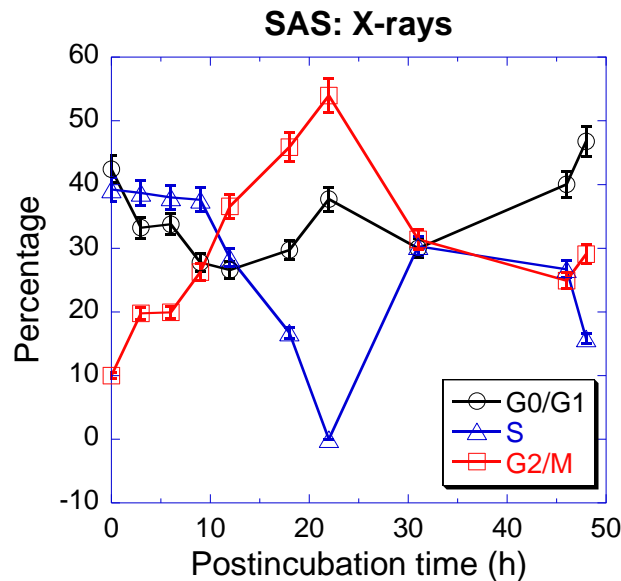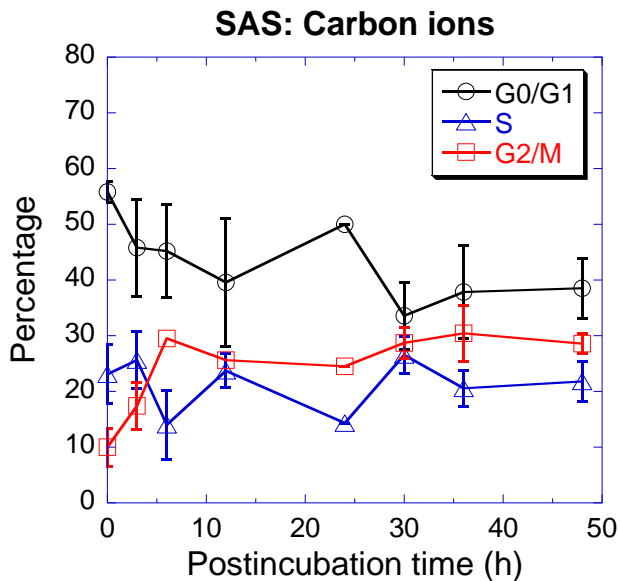

Figure S2: Dose dependency of cell cycle distribution 48h after exposure.

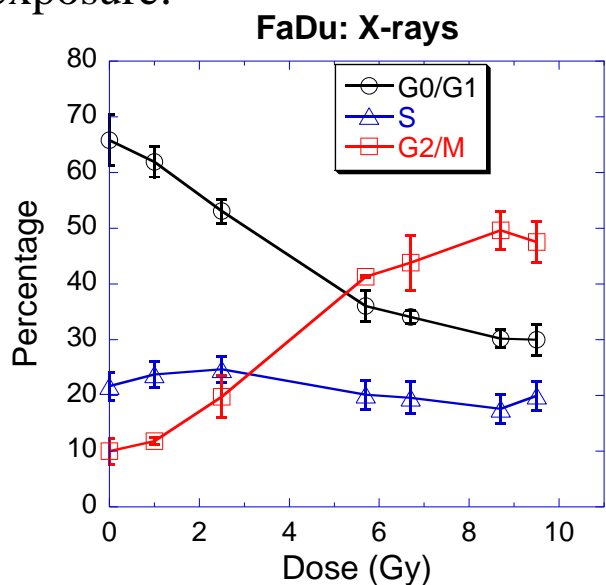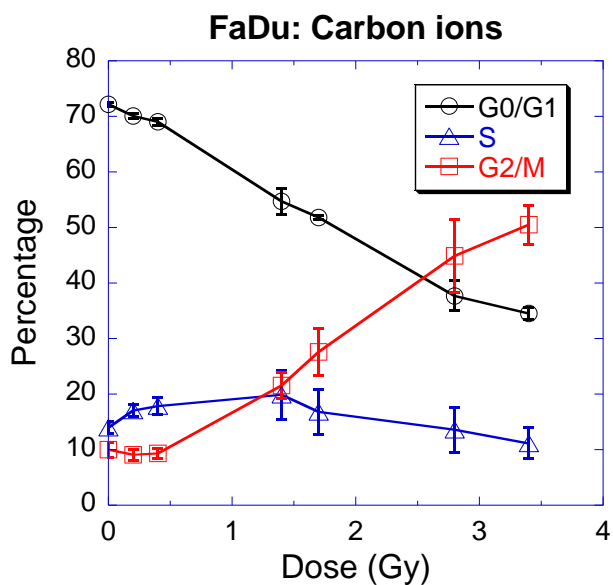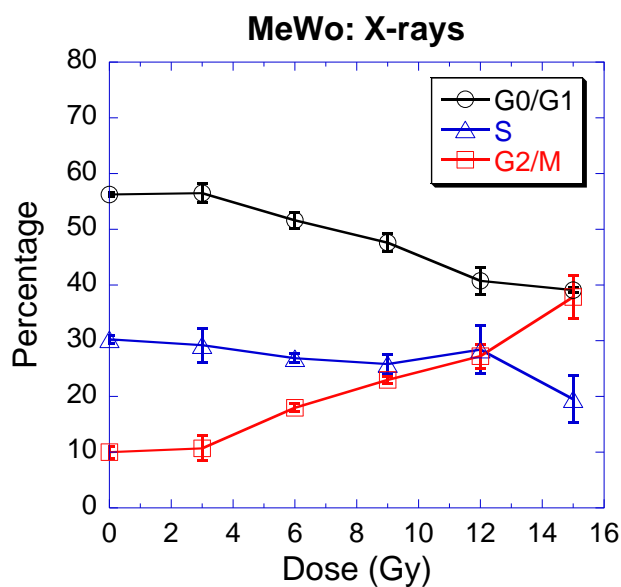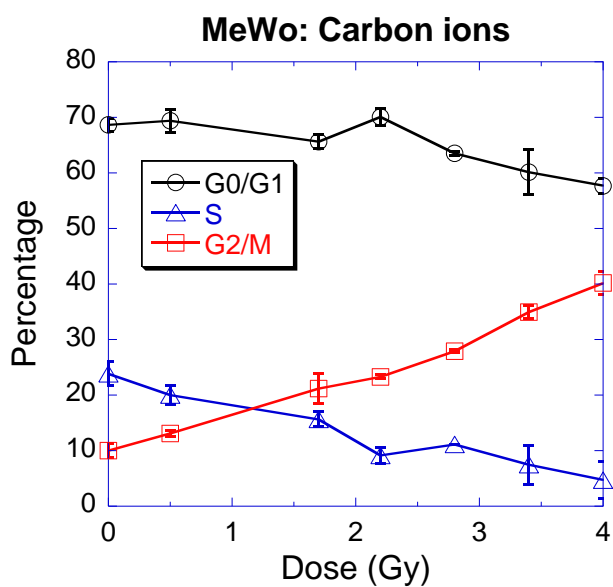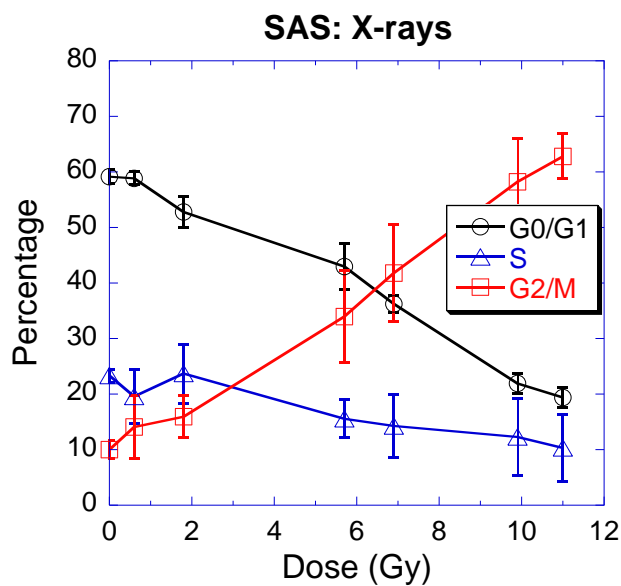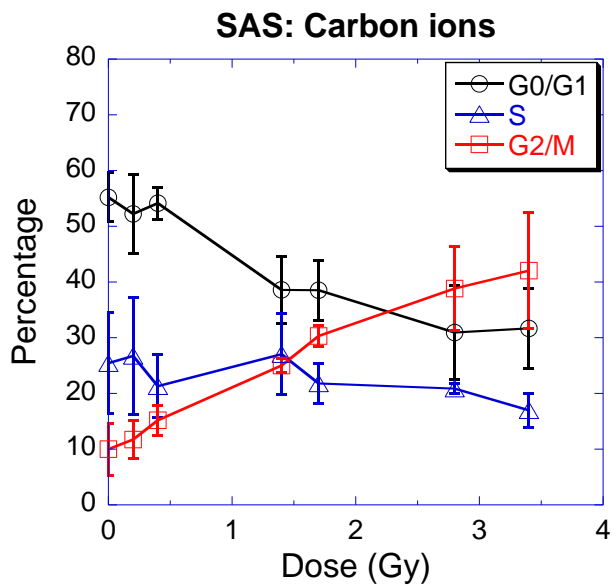

Supplement: Supplementary_Figures.pdf [file Supplementary_Figures.pdf]
